# Supplementary material for: Positional changes in the uvula tip after adenotonsillectomy in children: preliminary result
Source: PeerJ. 2021 Oct 1;9:e12243. doi: 10.7717/peerj.12243 (PMC8489408; doi:10.7717/peerj.12243)
Supplement: Supplemental Information 1 — Three parameters (palatal length, palatal angle, and retrouvula length) using lateral cephalometric analyses, sex, and age in children with or without adenotonsillectomy. [file peerj-09-12243-s001.xlsx]

## Sheet: raw data
				First measurement			Second measurement
Group	Sex	Age	Duration	Palatal_length(1)	Palatal_angle(1)	retrouvular_length(1)	palatal_length(2)	Palatal_angle(2)	retrovula_length(2)	Tonsil_grade	Adenoid_grade
1	2	11	98	22.865	42.75	23.22	23.6	48.72	22.19	3	2
1	2	7	111	27.3	33.865	17.42	27.205	44.92	13.59	2	3
1	1	10	113	28.265	45.33	10.425	27.79	41.4	15.82	2	2
1	1	12		35.46	47.14	14.53	31.19	44.27	17.06
1	1	7	111	25.67	38.39	17.065	27.355	42.905	13.035	3	3
1	1	6	110	17.69	30.145	23.69	22.405	42.195	23.075	3	2
1	2	12	127	24.41	53.91	19.455	26.56	52.855	14.49	4	3
1	1	12	129	25.78	50.905	20.905	26.425	51.25	20.925	3	2
1	1	13	128	25.575	33.265	21.125	29.63	39.93	17.505	4	2
1	1	9	131	24.21	46.475	23.725	29.505	45.385	16.03	4	3
1	1	8	133	24.795	30.895	11.445	24	40.055	13.85	4	2
1	1	7	132	24.43	33.675	9.41	23.49	42.61	20.485	3	3
1	1	4	150	22.225	40.545	12.58	23.06	45.38	15.66	4	4
1	1	5	163	21.095	34.88	12.1	19.75	35.65	16.955	3	3
1	1	7	164	19.81	28.15	13.62	20.865	40.5	18.505	4	3
1	2	5	174	26.885	36.91	11.485	23.985	43.62	17.62	3	3
1	1	7	176	25.675	34.65	14.08	24.375	49.795	15.72	4	3
1	2	6	189	23.885	43.83	17.59	24.315	43.325	16.25	3	3
1	1	7	101	26.72	28.285	13.075	30.665	41.475	15.315	3	3
1	2	9	107	26.4	31.25	14.14	26.425	42.24	14.77	4	3
1	1	5	106	27.675	39.475	11.585	24.885	46.845	16.875	4	4
1	1	4	100	27.6	44.68	10.86	22.615	52	10.605	2	2
1	2	8	99	23.9	43.35	15.385	24.23	46.475	17.21	2	2
1	1	3	108	23.98	35.665	13.33	22.815	35.73	11.595	3	4
1	2	5	110	24.385	39.245	16.885	24.115	35.17	12.495	3	3
1	1	12	110	32.9	40.505	12.98	33.945	38.43	13	2	3
1	1	6	107	24.295	19.51	14.385	25.045	38.705	16.1	3	3
1	2	7	97	19.645	39.02	9.87	20.815	47.255	17.895	4	3
1	2	5	103	22.925	27.37	11.885	22.215	33.155	15.985	3	2
1	2	6	103	26.455	38.735	14.71	26.76	40.445	14.215	3	3
1	1	6	117	26.655	46.905	14.02	23	45.035	20.68	3	3
1	1	8	111	22.985	41.275	13.835	26.8	47.705	19.925	4	2
1	2	5	106	26.465	39.17	14.795	27.915	43.295	13.565	3	3
1	1	11	99	27.82	48.315	19.78	26.87	51.93	14.585	3	4
1	2	10	131	17.59	45.32	11.06	17.395	50.68	16.965	3	2
1	2	8	104	19.695	41.195	19.345	21.025	37.19	14.18	4	2
1	1	7	117	26.82	40.985	13	27.375	43.11	17.04	3	2
1	1	11	103	26.88	37.84	16.635	24.63	41.345	24.43	3	1
1	2	8	103	26.595	35.46	18.915	27.535	44.66	20.48	3	2
1	2	8	100	25.235	35.295	13.9	23.555	39.56	14.19	3	2
1	2	6	191	25.495	41.515	7.705	24.605	42.395	13.28	4	3
1	1	8	101	19.675	38.985	21.875	24.56	38.555	23.215	3	2
1	1	8	121	24.465	40.225	14.52	28.285	40.905	15.2	3	2
1	1	11	114	24.18	52.34	17.19	31.63	53.42	23.07	3	1
1	2	4	99	21.655	29.35	11.36	20.995	46.1	17.555	3	2
1	1	8	111	23.805	42.255	24.23	26.715	31.54	13.14	3	3
1	1	8	110	23.315	40.905	17.1	25.33	49.71	19.735	4	2
1	2	9	113	22.63	45.55	15.31	26.23	49.12	17.43	2	2
1	2	6	111	21.16	51.61	17.91	26	50.41	21.595	3	3
1	1	8	113	23.11	42.69	14.945	22.48	50.4	16.735	3	2
1	1	8	106	23.945	54	19.71	24.08	55.005	19.455	3	3
1	1	5	134	25.27	43.02	15.01	24.625	50.855	17.7	3	4
1	2	11	135	26.965	39.17	18.07	26.775	40.495	18.685	4	4
1	2	7	110	21.145	45.565	17.605	22.935	46.3	19.66	2	2
1	1	11	103	30.515	48.68	16.525	30.505	51.715	18.97	3	3
1	2	12	118	29.65	44.8	15.555	26.6	44.525	15.98	3	2
1	2	8	110	25.895	42.93	12.245	27.39	46.025	12.025	4	4
1	1	5	104	21.845	43.81	14.8	23.68	47.75	13.815	3	3
1	1	12	104	30.425	62.665	18.7	28.355	61.015	16.065	3	3
1	2	5	103	22.515	43.6	10.69	21.64	47.385	10.99	2	2
1	2	14	103	29.515	41.99	19.965	28.7	44.165	16.25	3	2
1	1	10	104	27.845	51.81	18.345	27.565	54.135	19.365	3	2
1	1	4	106	25.155	57.265	11.27	19.81	51.58	12.165	3	3
1	2	4	100	20.525	48.61	15.73	22.335	48.635	15	3	3
1	1	4	103	17.435	48.825	12.56	16.775	54.11	16.73	3	2
1	1	6	104	20.76	55.35	16.275	23.77	52.305	13.85	3	3
1	1	5	109	18.325	43.95	13.78	19.69	52.22	16.49	3	2
1	2	5	139	25.15	46.505	9.755	21.525	40.435	9.925	3	4
1	2	5	103	18.035	39.66	14.685	23.815	44.77	13.8	3	3
1	1	13	116	26.45	48.115	18.3	27.595	47.375	21.96	4	3
1	2	3	111	19.46	62.55	21.37	20.34	48.825	14.435	4	3
1	1	5	109	22.34	47.53	18.785	22.07	52.015	16.18	3	3
1	2	8	96	28.235	48.71	15.83	27.71	52.545	17.12	3	3
1	2	10	99	22.015	46.19	20.36	23.785	45.08	17.67	3	2
1	1	6	107	20	44.675	14.865	19.355	58.39	14.44	3	2
1	2	5	99	17.34	55.91	15.5	21.03	48.11	16.465	3	3
1	2	5	106	18.98	56.38	13.42	22.195	47.87	18.42	4	2
1	1	6	99	25.595	46.965	17.025	27.71	43.74	18.88	4	3
1	1	4	103	22.935	49.025	17.895	25.51	50.31	20.165	2	3
1	1	4	104	20.64	54.965	17.37	23.17	51.645	13.825	3	3
1	2	6	99	24.625	48.08	14.11	21.6	53.565	14.54	4	3
1	1	7	114	21.945	46.465	12.285	18.125	61.235	15.825	3	3
1	2	5	114	19.75	42.645	15.94	21.625	46.79	14.875	3	2
1	2	9	100	22.47	43.27	19.43	24.315	38.65	18.785	3	3
1	1	4	121	23.06	34.145	13.83	24.5	39.135	14.5	3	3
1	2	7	99	26.36	43.22	13.605	25.86	47.84	16.405	3	3
1	1	3	113	24.995	47.04	16.535	24.76	48.55	17.195	3	2
1	2	11	120	20.345	52.355	20.07	22.215	50.87	18.19	4	3
1	1	4	100	23.47	33.43	11.725	22.62	38.09	13.535	3	2
1	1	7	40	23.575	44.695	18.67	25.395	46.505	18.25	3	2
1	1	5	111	23.48	45.51	12.705	24.035	47.57	17.255	3	3
1	1	5	117	18.99	45.565	15.835	20.355	43	18.795	3	2
1	2	6	104	21.9	43.15	13.86	18.85	46.89	18.54	3	3
1	1	4	106	19.785	51.675	15.535	21.365	57.545	15.04	2	2
0	1	8	88	27.6	46	13.77	27.89	46	13.91
0	2	3	12	23.61	47.5	12.04	24.58	48.3	12.44
0	1	3	125	27.09	42	15.21	28.28	42.2	16.18
0	2	3	75	26.04	41.8	16.17	26.08	44.6	15.25
0	1	5	75	26.23	43.6	15.48	26.61	44	14.95
0	1	5	104	18.28	35.4	16.79	18.34	35.6	16.57
0	2	8	99	23.13	51.6	17.25	21.54	59.4	12.54
0	1	9	76	23.56	40.3	16.97	24.2	36.3	17.1
0	1	8	147	21.95	43.6	18.56	22.7	46.4	18.67
0	2	8	19	22.53	42.7	12.34	21.32	41.6	13.16
0	2	6	93	24.29	32.6	17.69	23.46	41.7	15.24
0	1	6	115	20.1	45.1	16.41	21.87	45.4	16.12
0	1	3	103	28.14	39.5	12.43	27.8	38.5	12.7
0	1	8	149	20.75	41.3	12.37	20.82	44.5	15.69
0	1	4	95	26.52	35.7	15.9	25.57	32.9	13.34
0	1	4	89	20.31	39.5	15.31	21.32	40	15.25
0	2	8	105	24.25	45.4	18.97	24.1	41.7	19.98
0	1	4	75	25.37	37.3	15.97	25.34	34.9	17
0	1	5	93	25.65	45.3	17.32	25.13	40.1	16.98
0	2	9	86	25.33	44.3	14.89	27.65	40.1	16.45
0	1	8	73	25.56	47.4	16.11	26.51	44	15.15
0	1	9	158	27.52	48.3	12.84	27.8	46.4	13.2
0	2	5	118	25.13	48.4	15.58	25.05	46.7	14.36
0	1	5	115	28.79	47.5	17.76	30.17	43.3	16.04
0	1	8	103	26.94	49.7	13.78	26.92	49.5	13.81
0	1	5	84	27.22	40	17.61	26.95	39.5	17.43
0	1	6	70	26.81	42.1	13.31	26.63	44.7	13.47
0	1	5	74	26.19	49.1	15.06	26.36	45.9	15.31
0	1	5	97	29.23	39.9	16.95	28.11	40.3	16.5
0	1	5	91	26.38	40.1	13.11	26.44	42.2	13.46
0	1	5	106	23.61	25	13.86	23.58	29.2	14.58
0	2	5	107	25.65	43.6	19	25.3	42	19.47
0	1	3	162	21.82	37.8	14.77	21.84	35	15.78
0	2	5	47	28.54	47.1	13.28	26.76	43.5	13.43
0	2	5	82	28.61	30.4	12.44	30.84	32.9	11.08
0	1	4	34	25.54	39.4	18.12	26.15	39.5	17.28
0	2	5	107	24.21	31.7	15.11	24.14	32.6	15.29
0	2	5	83	24.18	45.9	12.93	24.2	41.2	12.42
0	2	3	111	22.03	33.1	11.86	22.1	35.2	12.55
0	1	7	87	22.68	47.6	16.68	20.59	47	14.79
0	2	3	74	23.6	36.9	15.71	24.96	36	13.98
0	2	2	139	24.66	36.3	13.32	24.73	38.3	13.99
0	2	4	133	21.49	42.4	18.73	21.4	44.1	17.84
0	1	5	64	25.38	45.3	18.66	24.81	41.9	17.16
0	2	3	87	27.34	42.6	15.71	27.63	43.2	15.41
0	2	7	160	24.54	35.9	17.45	28.74	44	16.51
0	2	2	147	19.07	33.5	19.77	18.95	36	19.7
0	2	2	94	26.64	38.7	15.78	26.85	35.3	13.83
0	2	3	136	28.19	36.2	14.11	28.25	40.4	15.89
0	1	5	109	23.4	34.4	16.64	23.52	33.2	17.97
0	1	6	83	28.77	44.2	15.34	25.9	32.7	16.5
0	2	7	86	33.88	33.4	14.39	32.23	38.7	18.33
0	2	6	127	26.63	41.1	14.75	23.76	35.7	14.54
0	1	3	42	24.42	43.7	15.97	24.42	39.6	16.59
0	2	3	85	21.76	44.8	13.47	22.48	43.5	14.16
0	1	6	83	25.58	43	15.37	25.69	45	15.98
0	1	2	133	28.65	47.3	13.6	27.77	49.5	15.31
0	1	2	105	23.73	35	19.83	27.6	47.4	22.29
0	1	6	126	22.93	37.9	15.58	23.54	35.7	15.9
0	1	2	119	23.32	36	17.65	24.22	44	20.78
0	1	3	75	23.61	45.4	15.44	22	41.1	15.04
0	1	5	121	24.42	39.8	18.77	24.7	49.1	15.51
0	2	2	109	20.4	56.2	14.86	17.6	52.6	15.54
0	2	4	154	25.02	41.4	12.13	24.92	44.4	13.33
0	1	5	131	25.25	25.2	19	25.17	31	19.71
0	2	3	107	22.74	34.2	17.98	22.75	35.9	18.84

## Sheet: Code book
Group	1	adenotonsillectomy group
	2	Control goruo
Sex	1	Boy
	2	Girl
